# Supplementary material for: RGEN-seq for highly sensitive amplification-free screen of off-target sites of gene editors
Source: Sci Rep. 2021 Dec 8;11:23600. doi: 10.1038/s41598-021-03160-8 (PMC8654851; doi:10.1038/s41598-021-03160-8)
Supplement: Supplementary file 7 — Supplementary Information 7. [file 41598_2021_3160_MOESM7_ESM.xlsx]

## Sheet: Sheet1
Method Step	RGEN-seq	Digenome	Site-seq	CIRCLE-seq	Change-seq
sgRNA/Cas9reaction	+	+	+	+	+
RNase or ProteinaseK	+	+	+	+	+
1st DNA cleanup	+	+	+	+	+
1st A-tailing	+	+	+	+	+
DNA circulization	-	-	-	+	+
1st Ligation	+	+	+	-	-
2nd DNA cleanup	+	+	+	+	+
Fragmentation or Tagmentation	+	+	+	+	+
2nd Ligation	+	-	+	+	+
3rd DNA cleanup	+	-	+	+	+
2nd A-taling	-	-	+	+	-
4th-13th DNA cleanup	-	-	+	+(10)	+(6)
1st PCR	-	-	+	+	+
2nd PCR	-	-	+	-	-
T4 PNK	-	-	-	+	+
Linear DNA degradation	-	-	-	+	+
DNA end-repair or Gap repair	-	-	-	+	+
2nd ProteinaseK	-	-	-	-	+
3rd ProteinaseK	-	-	-	-	+
Time	1 days	1days	3days	7days	3Days
Sensitivity	high	low	high	high	high
